# Supplementary material for: Engineered Expression of Vip3A in Green Tissues as a Feasible Approach for the Control of Insect Pests in Maize
Source: MDPI journal article supplement (doi:10.3390/insects14100803), 2023-10-06
Supplement: s1 [file s1]

## Supplementary Materials

**Table S1.** Primers used for transgenes identification

| Genes           | Forward primer              | Reverse primer           |
|-----------------|-----------------------------|--------------------------|
| <i>Zm1rbcS</i>  | ACGACGGTGAAACGAAGGAA        | GTCGAACGCTAGAGCCTGT      |
| <i>Cre</i>      | ATTTGCCTGCATTACCGGTC        | TCAGAAAACGCCTGGCGATC     |
| <i>Vip3A</i>    | ATTTGCTTGGTACTGTTTCTTTGTCGA | GATGCCGTTGAAGTAGTCGATGAA |
| <i>18S rRNA</i> | CTGAGAAACGGCTACCACA         | CCCAAGGTCCAACCTACGAG     |

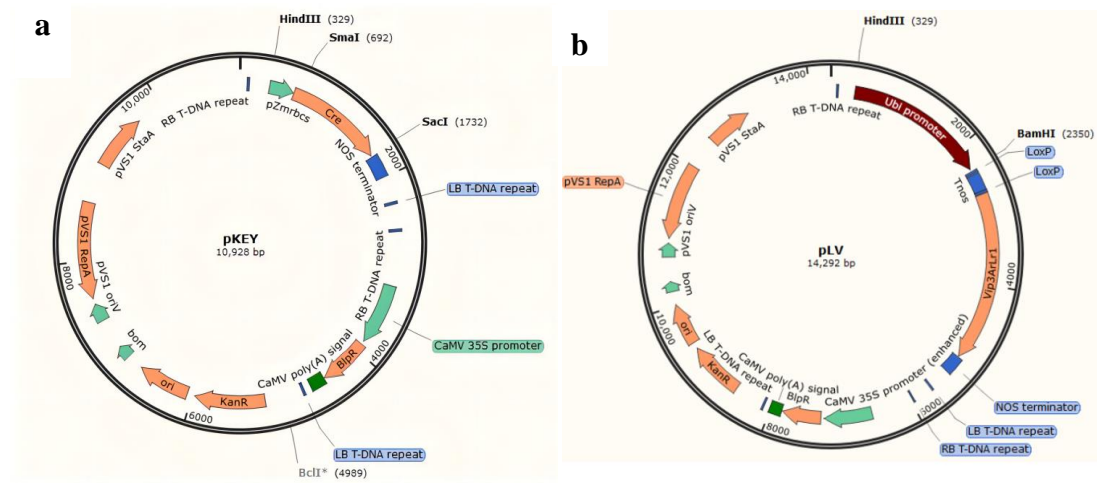

**Supplementary Figure S1.** Fusion gene cassettes pKEY and pLOCK were constructed in the Cre/loxP-mediated system. (a) The pKEY vector. The green tissue-specific promoter *Zm1rbcs* was cloned in front of the *Cre* recombinase gene tagged with the nuclear localization sequence (NLS) of *Arabidopsis Krp2* to trigger the recombination expressing in green tissues. (b) The pLOCK vector. The pLOCK cassette was constructed with the strong constitutive promoter *ZmUbi* following a *Nos* terminator which was embedded into two *loxP* sites as a lock to block the expression of the *Vip3A* gene. The plant binary vector pCAMBIA3300 was used as basic plasmid. The *hygromycin B phosphotransferase* (*HPT*) gene in pCAMBIA3300 was served as a selectable marker for transformation.

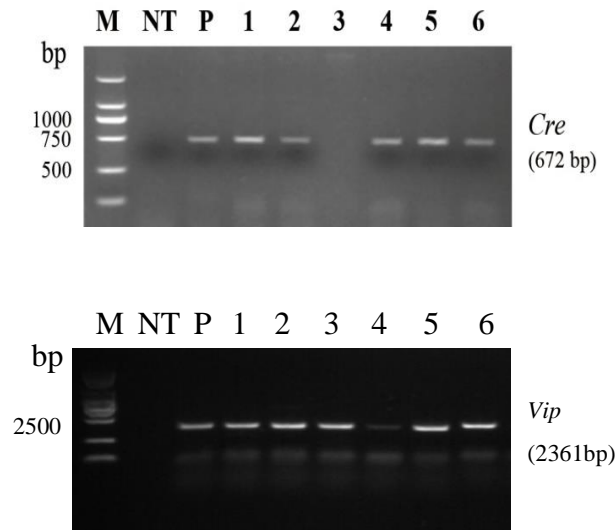

**Supplementary Figure S2.** Photographs of transgenes with PCR products obtained on T<sub>2</sub> transgenic maize plants. (Above) The *Cre* gene was present in individual KEY transgenic plants. (Below) The *Vip3A* gene was present in individual LOCK transgenic plants. Lane M represents DNA ladder as a size marker. NT indicates non-transgenic plants KN5585. P indicates control plasmid. Lanes 1-6 represent PCR products of individual transgenic T<sub>2</sub> maize plants.
